# Supplementary material
Source: PubMed Central journal article supplement (PMC5892796)

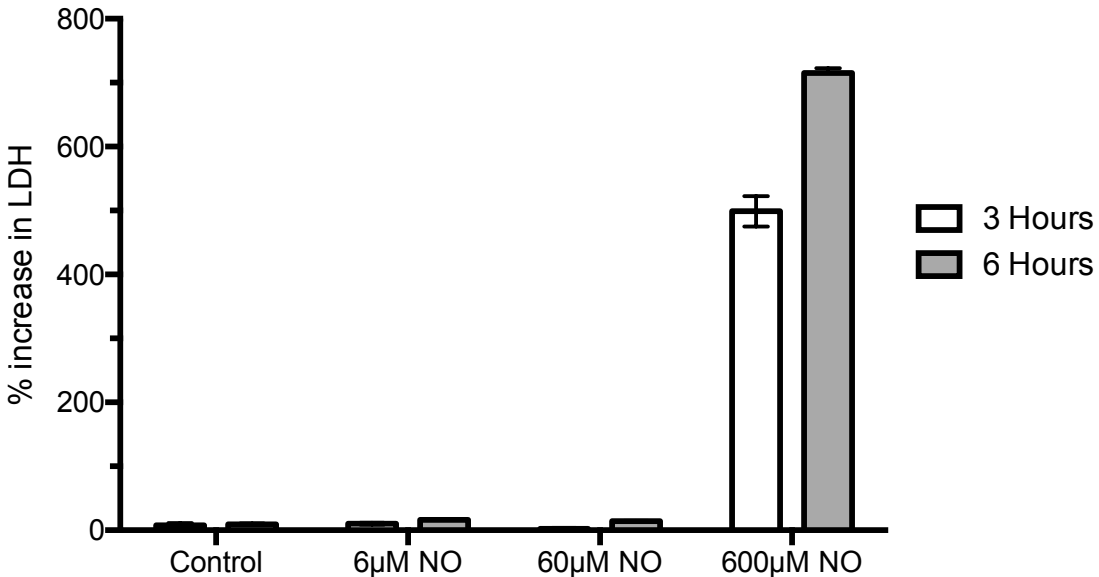

Supplement: NIHMS955265-supplement-supplemental_figure.pdf [file NIHMS955265-supplement-supplemental_figure.pdf]
